# Supplementary material
Source: Springer Nature journal article supplement (https://www.springermedizin.de/resource/supplementary/12916_2007_117_MOESM1_ESM.pdf/9599202)

(a)

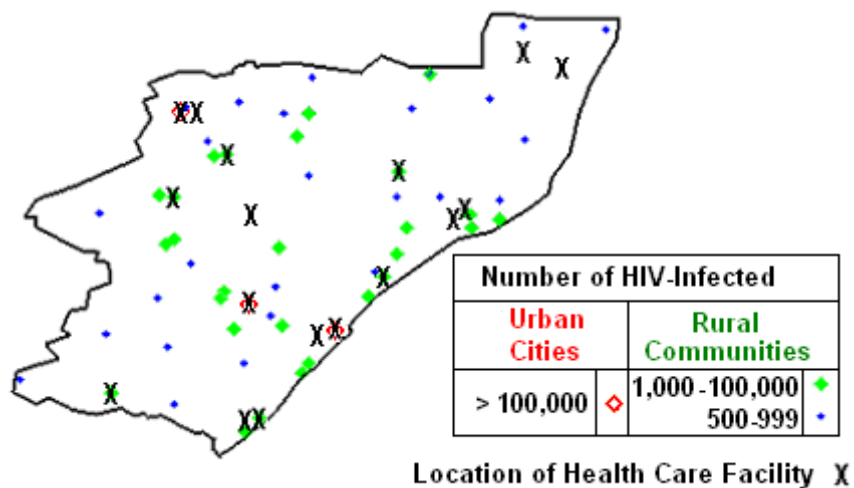

(b)

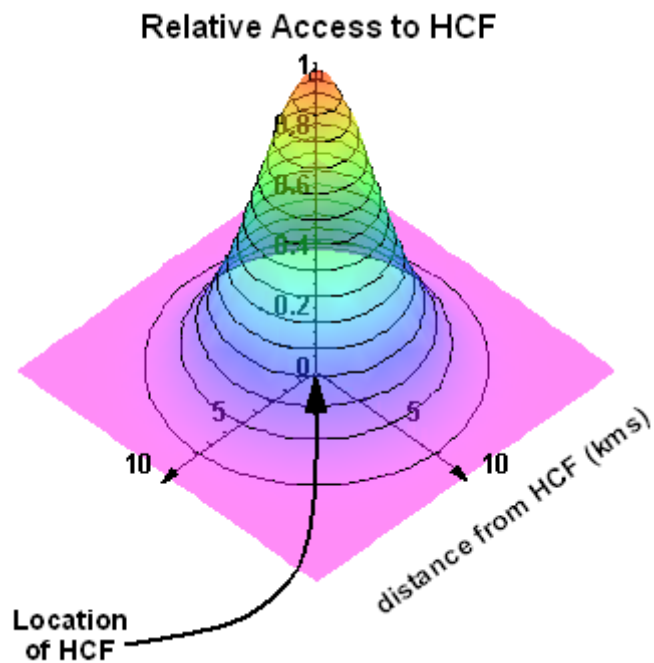

Supplement: MOESM1 [file 9599202]
